# Supplementary material
Source: PubMed Central journal article supplement (PMC7459550)
Supplement: JVI.01056-20-s0001.pdf [file JVI.01056-20-s0001.pdf]

Supplementary Table 1. Sequencing results.

| Sample ID | Virus_name                | Sample Type <sup>#</sup> | Raw valid reads | On-target reads (%) | Genome coverage | Depth | Mean Depth* |
|-----------|---------------------------|--------------------------|-----------------|---------------------|-----------------|-------|-------------|
| 2         | Mexico/CDMX-INNER_01      | NPS                      | 13,949,246      | 12,406 (0.09)       | 99.17           | 30    | 30          |
| 5         | Mexico/CDMX-INNER_02      | NPS                      | 26,958,293      | 28,208 (0.10)       | 98.56           | 69    | 70          |
| 6         | Mexico/CDMX-INNER_03      | NPS                      | 11,143,321      | 3,970 (0.04)        | 84.25           | 9     | 11          |
| 7         | Mexico/CDMX-INNER_04      | NPS                      | 10,372,811      | 21,080 (0.20)       | 99.82           | 51    | 51          |
| 8         | Mexico/CDMX-INNER_05      | NPS                      | 2,274,643       | 11,648 (0.51)       | 99.73           | 28    | 28          |
| 13        | Mexico/Chihuahua-IMSS_01  | NPS                      | 12,785,238      | 7,331 (0.06)        | 90.98           | 18    | 20          |
| 16        | Mexico/Chiapas-InDRE_02   | OPS                      | 4,322,780       | 1,739 (0.04)        | 83.06           | 4     | 8           |
| 17        | Mexico/EdoMex-InDRE_03    | NAS                      | 8,173,886       | 85,170 (1.04)       | 99.90           | 200   | 200         |
| 19        | Mexico/Queretaro-InDRE_04 | OPS                      | 9,394,551       | 60,545 (0.64)       | 99.91           | 145   | 145         |
| 22        | Mexico/Puebla-InDRE_05    | OPS                      | 5,030,534       | 39,210 (0.78)       | 99.90           | 93    | 93          |
| 24        | Mexico/CDMX-InDRE_06      | OPS                      | 3,890,600       | 109,000 (2.81)      | 99.92           | 256   | 256         |
| 27        | Mexico/CDMX-INCMNSZ_01    | NPS                      | 14,770,367      | 79,364 (0.54)       | 99.88           | 164   | 164         |
| 28        | Mexico/CDMX-INCMNSZ_02    | NPS                      | 2,898,415       | 21,985 (0.76)       | 99.90           | 53    | 53          |
| 30        | Mexico/CDMX-INCMNSZ_03    | NPS                      | 3,956,195       | 23,550 (0.60)       | 99.91           | 57    | 57          |
| 31        | Mexico/CDMX-INCMNSZ_04    | NPS                      | 4,581,562       | 97,388 (2.13)       | 99.92           | 228   | 228         |
| 32        | Mexico/CDMX-INCMNSZ_05    | NPS                      | 2,648,330       | 7,813 (0.30)        | 99.34           | 19    | 19          |
| 33        | Mexico/CDMX-InDRE_01      | NPS                      | 2,662,304       | 1,000,109 (37.57)   | 100.00          | 3983  | 3983        |

<sup>#</sup> Abbreviation: NPS=nasopharyngeal swab, OP= oropharyngeal swab, NAS=nasopharyngeal aspirate

\* In relationship to the ratio of unambiguous bases to the reference sequence length (using at least 5 unique reads and 90% agreement during base calling)

Supplementary Table 2. Clustering patterns for the Mexican samples within the reduced and large-scale WG and individual ORF ML trees.

| reduced -WG <sup>1</sup>                                                                                                                                                                                                                                                                                                                                                                            | large-scale WG <sup>1</sup>        | large-scale Orf1a <sup>1</sup>     | large-scale Orf1b <sup>1</sup>     | large-scale S <sup>1</sup> |
|-----------------------------------------------------------------------------------------------------------------------------------------------------------------------------------------------------------------------------------------------------------------------------------------------------------------------------------------------------------------------------------------------------|------------------------------------|------------------------------------|------------------------------------|----------------------------|
| IE1-bs 78<br>22_Mexico/Puebla-IndRE_05/2020 EPI_ISL_424672 Mexico_Puebla 31 M EH_Spain_France 3_11_2020<br>Portugal/PT0024/2020 EPI_ISL_418009 PRT_Portugal Age_29 Sex_F D0_NA EH_NA 3_15_2020<br>Basal-bs 96: Spain/Madrid_H11_40/2020 EPI_ISL_417967 ESP_Madrid Age_44 Sex_F D0_NA EH_NA 3_12_2020                                                                                                | IE1-bs 6<br>YES                    | IE1-bs 0<br>NO                     | IE1-bs 0<br>YES                    | IE1-bs 0<br>NO-POLYTOMY    |
| IE2-bs 8<br>32_Mexico/CDMX-INCMNSZ_05/2020 EPI_ISL_426365 Mexico_CDMX 70 F EH_Vail_USA 3_12_2020<br>Australia/VIC254/2020 EPI_ISL_419949 AUS_Victoria Age_67 Sex_M D0_NA EH_NA 2020_03_21<br>Basal-bs 0: Australia/VIC164/2020 EPI_ISL_419861 AUS_Victoria Age_37 Sex_NA D0_NA EH_NA 2020_03_18                                                                                                     | IE2-bs 27<br>YES                   | IE2-bs 0<br>NO                     | IE2-bs 0<br>NO                     | IE2-bs 0<br>NO             |
| IE3-bs 0<br>5_Mexico/CDMX-INER_02/2020 EPI_ISL_424348 Mexico_CDMX 55 F EH_Spain_France 3_13_2020<br>Spain/Madrid_H12_1905/2020 EPI_ISL_421175 ESP_Madrid Age_25 Sex_F D0_NA EH_NA 2020_03_29<br>Basal-bs: None                                                                                                                                                                                      | IE3-bs 0<br>YES                    | IE3-bs 0<br>NO                     | IE3-bs 0<br>YES-POLYTOMY           | IE3-bs 0<br>NO             |
| IE4-bs 56<br>2_Mexico/CDMX-INER_01/2020 EPI_ISL_424345 Mexico_CDMX 42 M EH_Spain 3_12_2020<br>Hungary/2/2020 EPI_ISL_418183 HUN_Baranya Age_26 Sex_F D0_H EH_NA 2020_03_17<br>Basal-bs 0: None                                                                                                                                                                                                      | IE4-bs 61<br>NO                    | IE4-bs 0<br>NO                     | IE4-bs 0<br>NO-POLYTOMY            | IE4-bs 0<br>NO             |
| IE5-bs 68<br>Wales/PHWC_25551/2020 EPI_ISL_421004 GBR_Wales Age_73 Sex_M D0_NA EH_NA 2020_03_23<br>16_Mexico/Chiapas-IndRE_02/2020 EPI_ISL_424666 Mexico_Chiapas 18 F EH_Italy 2_29_2020<br>Basal-bs 0: None                                                                                                                                                                                        | IE5-bs 19<br>YES                   | IE5-bs 0<br>NO                     | IE5-bs 0<br>NO                     | IE5-bs 0<br>NO-POLYTOMY    |
| IE6-bs 0<br>33_Mexico/CDMX-INRE_01/2020 EPI_ISL_412972 Mexico_CDMX 35 M EH_Italy 2_27_2020<br>Basal-bs 1: England/20122119502/2020 EPI_ISL_418681 GBR_England Age_31 Sex_F D0_NA EH_NA 2020_03_17                                                                                                                                                                                                   | IE6-bs 1<br>NO                     | IE6-bs 0<br>NO-POLYTOMY            | IE6-bs 0<br>NO-POLYTOMY            | IE6-bs 0<br>NO-POLYTOMY    |
| IE7-bs 84<br>6_Mexico/CDMX-INER_03/2020 EPI_ISL_424625 Mexico_CDMX 29 M EH_Spain 3_13_2020<br>England/20108034006/2020 EPI_ISL_417258 GBR_England Age_74 Sex_F D0_NA EH_NA 2020_03_06                                                                                                                                                                                                               | IE7-bs 67<br>YES                   | IE7-bs 0<br>YES                    | IE7-bs 27<br>YES                   | IE7-bs 0<br>NO             |
| IE8-bs 42<br>Italy/TE4959/2020 EPI_ISL_418259 ITA_Abruzzo Age_76 Sex_M D0_NA EH_NA 2020_03_14<br>13_Mexico/Chihuahua-IMSS_01/2020 EPI_ISL_424731 Mexico_Chihuahua 21 M EH_UK_France_USA 3_13_2020<br>Basal-bs 0: None                                                                                                                                                                               | IE8-bs 18<br>YES                   | IE8-bs 0<br>NO                     | IE8-bs 0<br>NO-POLYTOMY            | IE8-bs 0<br>NO-POLYTOMY    |
| IE9-bs 91<br>7_Mexico/CDMX-INER_04/2020 EPI_ISL_424626 Mexico_CDMX 25 F EH_Egypt_Barcelona_Spain 3_15_2020<br>England/SHEF_C0707/2020 EPI_ISL_420270 GBR_England Age_73 Sex_F D0_NA EH_NA 2020_03_22<br>Basal-bs: None                                                                                                                                                                              | IE9-bs 79<br>YES                   | IE9-bs 0<br>YES                    | IE9-bs 0<br>NO-POLYTOMY            | IE9-bs 0<br>NO             |
| IE10-bs 99<br>Australia/VIC110/2020 EPI_ISL_419716 AUS_Victoria Age_62 Sex_F D0_NA EH_NA 2020_03_18<br>24_Mexico/CDMX-INRE_06/2020 EPI_ISL_424673 Mexico_CDMX 63 F EH_Denver_USA 3_12_2020                                                                                                                                                                                                          | IE10-bs 0<br>NO                    | IE10-bs 2<br>YES                   | IE10-bs 0<br>YES-POLYTOMY          | IE10-bs 0<br>YES-POLYTOMY  |
| LT11-bs 100 CLUSTER<br>31_Mexico/CDMX-INCMNSZ_04/2020 EPI_ISL_426364 Mexico_CDMX 70 M EH_Vail_USA 3_12_2020<br>8_Mexico/CDMX-INER_05/2020 EPI_ISL_424627 Mexico_CDMX 38 M EH_None 3_15_2020<br>27_Mexico/CDMX-INCMNSZ_01/2020 EPI_ISL_426361 Mexico_CDMX 32 M EH_None 3_12_2020<br>30_Mexico/CDMX-INCMNSZ_03/2020 EPI_ISL_426363 Mexico_CDMX 38 M EH_None 3_12_2020<br>Basal-bs: None               | IE11-bs 98 CLUSTER<br>YES          | C11.1-bs 0<br>BROKEN CLUSTER       | C11.1-bs 0<br>BROKEN CLUSTER       | IE11-bs 89 CLUSTER<br>YES  |
| IE12-bs 2<br>28_Mexico/CDMX-INCMNSZ_02/2020 EPI_ISL_426362 Mexico_CDMX 71 M EH_Vail_USA_Germany 3_10_2020<br>Basal-bs 0: Spain/CastillaLeon201372/2020 EPI_ISL_418249 ESP_Castilla_y_Leon Age_25 Sex_F D0_NA EH_NA 2020_03_03                                                                                                                                                                       | IE12-bs 0<br>YES                   | IE12-bs 0<br>YES                   | IE12-bs 0<br>YES-POLYTOMY          | IE12-bs 0<br>NO            |
| IE13-bs 87<br>Chile/Talca_2/2020 EPI_ISL_414578 CHL_Talca Age_33 Sex_F D0_NA EH_NA 2020_03_04<br>Chile/Talca_1/2020 EPI_ISL_414577 CHL_Talca Age_33 Sex_M D0_R EH_Asia_Europe 2020_03_02<br>17_Mexico/EdoMex-IndRE_03/2020 EPI_ISL_424667 Mexico_Edomex 71 M EH_Italy 3_4_2020<br>Basal-bs 2: 19_Mexico/Queretaro-IndRE_04/2020 EPI_ISL_424670 Mexico_Queretaro 43 M EH_Spain_Holand_USA 13_10_2020 | IE13-bs 0<br>YES                   | IE13-bs 0<br>YES                   | IE13-bs 33<br>YES                  | IE13-bs 0<br>NO            |
|                                                                                                                                                                                                                                                                                                                                                                                                     | NO-POLYTOMY-BROKEN CLUSTER WITH 19 | NO-POLYTOMY-BROKEN CLUSTER WITH 19 | NO-POLYTOMY-BROKEN CLUSTER WITH 19 | NO                         |

<sup>1</sup>Consistency for clustering patterns observed within >2 trees and/or bootstrap support values >50 are indicated in red. YES/NO indicates conserved clustering patterns.





Supplementary Table 5. Amino acid changes within the Mexican samples compared to the reference strain Wuhan-Hu-1.

|                                                 | Genomic region in WG concatenated ORF a1n <sup>1</sup> site/aa change compared to MN908947 |     |     |      |      |      |        |                   |         |      |      |      |         |         |      |      |      |                  |              |      |      |                   |      |                  |               |      |      |            |         |         |   |
|-------------------------------------------------|--------------------------------------------------------------------------------------------|-----|-----|------|------|------|--------|-------------------|---------|------|------|------|---------|---------|------|------|------|------------------|--------------|------|------|-------------------|------|------------------|---------------|------|------|------------|---------|---------|---|
|                                                 | Orf1a (1-4405)                                                                             |     |     |      |      |      |        | Orf1b (4406-7000) |         |      |      |      |         |         |      |      |      | Orf3 (8505-8779) |              |      |      | Orf7a (8780-8900) |      | Orf8 (8901-9021) | N (9022-9440) |      |      |            |         |         |   |
|                                                 | 224                                                                                        | 889 | 892 | 1649 | 2193 | 2244 | 3071   | 3606              | 4619    | 5190 | 5207 | 5696 | 5732    | 5769    | 6068 | 6103 | 7058 | 7582             | 7623         | 7739 | 8208 | 8268              | 8571 | 8700             | 8771          | 8817 | 8885 | 8984       | 9224    | 9225    |   |
| MN908947                                        | T                                                                                          | L   | P   | A    | S    | I    | F      | L                 | P       | E    | N    | S    | P       | Y       | P    | A    | H    | T                | D            | S    | D    | D                 | K    | G                | P             | G    | A    | L          | R       | G       |   |
| 7_Mexico/CDMX-INER_04                           | .                                                                                          | .   | L   | .    | T    | .    | .      | .                 | L       | .    | .    | L    | .       | .       | .    | .    | .    | .                | G            | .    | .    | .                 | .    | .                | .             | .    | .    | .          | .       | .       | . |
| 22_Mexico/Puebla-IN-DRE_05                      | .                                                                                          | .   | .   | .    | .    | .    | .      | .                 | L       | .    | .    | L    | .       | .       | .    | .    | .    | .                | G            | .    | .    | .                 | .    | .                | .             | V    | .    | .          | .       | .       |   |
| 2_Mexico/CDMX-INER_01                           | .                                                                                          | .   | .   | .    | X    | .    | .      | .                 | L       | .    | .    | .    | .       | .       | .    | .    | .    | .                | G            | .    | .    | .                 | .    | .                | .             | .    | .    | .          | .       | .       |   |
| 32_Mexico/CDMX-INCMNSZ_05                       | .                                                                                          | .   | .   | .    | .    | .    | .      | .                 | L       | .    | .    | .    | .       | .       | .    | .    | .    | .                | G            | .    | .    | .                 | .    | .                | .             | .    | .    | .          | .       | .       |   |
| 5_Mexico/CDMX-INER_02                           | .                                                                                          | .   | .   | .    | .    | .    | .      | .                 | L       | .    | .    | .    | .       | .       | .    | .    | .    | .                | G            | .    | .    | .                 | .    | .                | .             | .    | .    | .          | .       | .       |   |
| 6_Mexico/CDMX-INER_03                           | .                                                                                          | X   | X   | L    | X    | X    | .      | .                 | L       | .    | D    | .    | .       | .       | X    | G    | .    | .                | X            | .    | E    | .                 | .    | .                | .             | A    | X    | X          | .       | X       |   |
| 13_Mexico/Chiuhua-IMSS_01                       | .                                                                                          | F   | .   | .    | X    | F    | X      | .                 | L       | .    | .    | .    | .       | .       | A    | .    | .    | .                | G            | C    | .    | .                 | E    | .                | .             | .    | X    | .          | .       | K       |   |
| 33_Mexico/CDMX-IN-DRE_01                        | .                                                                                          | .   | .   | .    | .    | .    | .      | .                 | L       | .    | .    | .    | .       | .       | .    | .    | .    | .                | G            | .    | .    | .                 | .    | .                | .             | .    | .    | .          | .       | K       |   |
| 16_Mexico/Chiapas-IN-DRE_02                     | .                                                                                          | .   | .   | .    | X    | X    | .      | .                 | X       | K    | .    | .    | .       | .       | X    | .    | .    | X                | X            | .    | .    | .                 | X    | .                | X             | .    | X    | X          | .       | K       |   |
| 27_Mexico/CDMX-INCMNSZ_01                       | .                                                                                          | .   | .   | .    | .    | .    | .      | .                 | .       | .    | .    | .    | L       | C       | .    | .    | Y    | .                | .            | .    | .    | .                 | .    | .                | .             | .    | .    | .          | .       | S       |   |
| 30_Mexico/CDMX-INCMNSZ_03                       | .                                                                                          | .   | .   | .    | .    | .    | .      | .                 | .       | .    | .    | .    | L       | C       | .    | .    | Y    | .                | .            | .    | .    | .                 | .    | .                | .             | .    | .    | .          | .       | S       |   |
| 31_Mexico/CDMX-INCMNSZ_04                       | .                                                                                          | .   | .   | .    | .    | .    | .      | .                 | .       | .    | .    | .    | L       | C       | .    | .    | Y    | .                | .            | .    | .    | .                 | .    | .                | .             | .    | .    | .          | .       | S       |   |
| 8_Mexico/CDMX-INER_05                           | .                                                                                          | .   | .   | .    | .    | .    | .      | .                 | .       | .    | .    | .    | L       | C       | .    | .    | Y    | .                | .            | .    | .    | .                 | .    | .                | .             | .    | .    | .          | .       | S       |   |
| 24_Mexico/CDMX-IN-DRE_06                        | I                                                                                          | .   | .   | .    | .    | .    | .      | F                 | .       | .    | .    | .    | L       | C       | .    | .    | .    | .                | .            | .    | .    | .                 | .    | .                | .             | .    | .    | .          | .       | S       |   |
| 28_Mexico/CDMX-INCMNSZ_02                       | .                                                                                          | .   | .   | .    | .    | .    | Y      | .                 | .       | .    | .    | .    | .       | .       | .    | .    | .    | .                | .            | .    | .    | .                 | .    | .                | .             | .    | .    | .          | .       | S       |   |
| 19_Mexico/Queretaro-IN-DRE_04                   | .                                                                                          | .   | .   | .    | .    | .    | .      | .                 | .       | .    | .    | .    | .       | .       | .    | .    | .    | .                | .            | .    | .    | .                 | .    | .                | .             | .    | .    | .          | .       | S       |   |
| 17_Mexico/EdoMex-IN-DRE_03                      | .                                                                                          | .   | .   | .    | .    | .    | .      | .                 | .       | .    | .    | .    | .       | .       | .    | .    | .    | .                | .            | .    | .    | .                 | .    | .                | .             | .    | .    | .          | .       | S       |   |
| Frequency <sup>3</sup>                          | T99                                                                                        | L99 | P99 | A99  | S99  | I99  | F98 Y2 | L83 F15           | L58 P42 | E99  | N99  | S99  | P87 L12 | Y86 C13 | P99  | A99  | H99  | T99              | Y58 D41      | S99  | D99  | D99               | K99  | G98 V2           | P99           | G99  | A99  | L82 S18    | R83 K16 | G83 R16 |   |
| Non-conservative amino-acid change <sup>2</sup> | ■                                                                                          | ■   | ■   | ■    | ■    | ■    | ■      | ■                 | ■       | ■    | ■    | ■    | ■       | ■       | ■    | ■    | ■    | ■                | ■            | ■    | ■    | ■                 | ■    | ■                | ■             | ■    | ■    | ■          | ■       | ■       | ■ |
| Changes observed <sup>2</sup>                   | #                                                                                          | ■   | ■   | ■    | NS   | §    | WS NS  | WS                | WS      | WS   | WS   | WS   | WS      | WS      | WS   | WS   | WS   | WS               | WS           | WS   | NS   | §                 | §    | §                | ‡             | WS   | WS   | WS         | WS      |         |   |
| Lineage defining mutations <sup>2</sup>         |                                                                                            |     |     |      |      |      |        | A2a (P314L)       |         |      |      |      |         |         |      |      |      |                  | A2/G (D614G) |      |      |                   |      |                  |               |      |      | B/S (L84S) |         |         |   |
| Evidence for positive selection <sup>4</sup>    |                                                                                            |     |     |      |      |      |        |                   |         |      |      |      |         |         |      |      |      |                  |              |      |      |                   |      |                  |               |      |      |            |         |         |   |

<sup>1</sup> General lineage defining mutations are shown in blue and orange, as defined in <https://nextstrain.org/ncov/global> and in GISAID preliminary analysis summary update 2020-04-08 1500UTC. No changes observed in M CDS (8283-8504).

<sup>2</sup> Non-conservative amino-acid changes shown in red

<sup>3</sup> Cluster defining homoplasic mutation of the Mexican sequences are shown in black.

<sup>4</sup> Widespread mutations are indicated under WS. Mutations also in Nexstrain are marked as NS. Unique changes to the Mexican sequences representing singletons are shown in gray.

■ Shared with USA/WA\_UW153/2020|EPI\_ISL\_416691|2020\_03\_13

■ Shared with England/SHEF\_C0707/2020|EPI\_ISL\_420270|2020\_03\_22

§ Shared with 45 sequences, mostly from Spain.

† Shared with 5 sequences from Australia, Portugal, Spain and USA.

‡ Shared with Portugal/PT0024/2020|EPI\_ISL\_418009|2020\_03\_15

\* USA/WA\_UW304/2020|EPI\_ISL\_418872|2020\_03\_23

<sup>3</sup> Frequency of a given aa in percentage observed in the a1n. Only changes present in > 1% of the sequences in the a1n are shown.

<sup>4</sup> Sites with a dN/dS >1 are shown in green, as compared to the list of sites determined under diverse dN/dS models described in <http://covid19.datamonkey.org/2020/04/01/covid19-analysis/>
